# Supplementary material
Source: Research Square preprint supplement (doi:10.21203/rs.3.rs-9050026/v1)
Supplement: Supplementary file 1 [file f4b531bbcab25b94df1488f3.docx]

**Supplementary Figure 1**


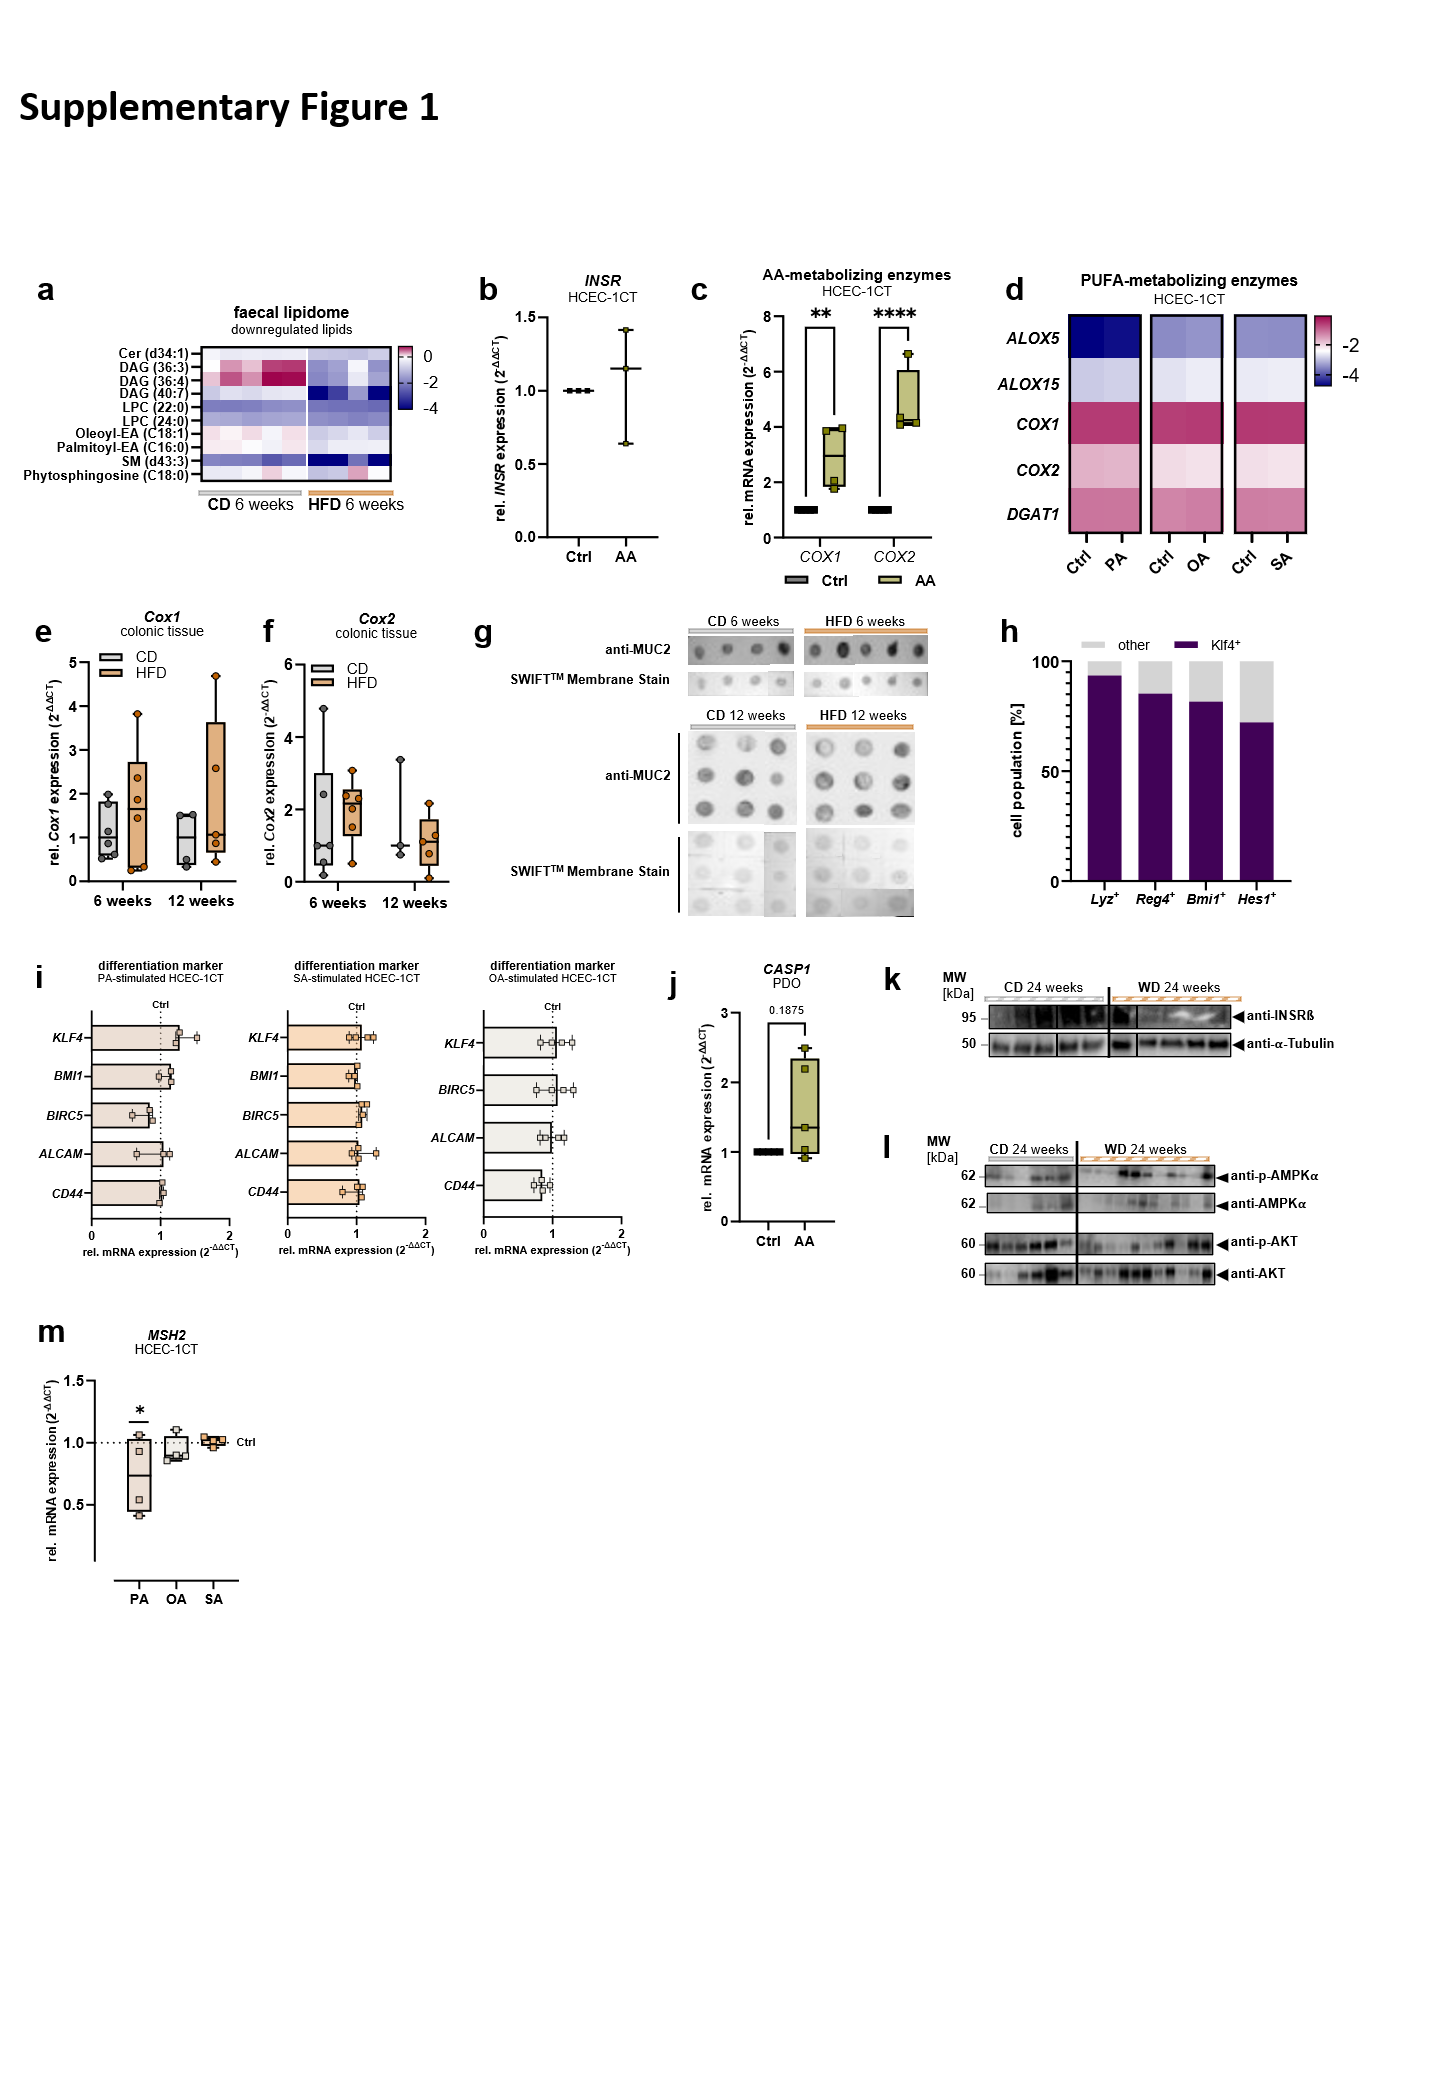


**Supplementary Fig. 1 | Characterization of diet-induced alterations in cellular metabolism and differentiation. (a)** Heatmap of significantly downregulated lipid molecules in faecal samples of mice after 6 weeks of HFD (n=4) in comparison to CD (n=5). **(b)** Expression of *INSR* in HCEC-1CT cells (n=3) stimulated with 10 *µ*M AA (n=3) relative to DMSO-treated HCEC-1CT (Ctrl, n=3). **(c)** Relative expression of *COX1* and *COX2* in HCEC-1CT cells (n=4) stimulated with 10 *µ*M AA (n=4) compared to DMSO-treated HCEC-1CT (Ctrl, n=4). **(d)** Expression of PUFA-metabolizing enzymes in PA, OA, or SA-treated HCEC-1CT (n=3-5 per group) relative to DMSO-, H2O-, or EtOH-cultured HCEC-1CT (Ctrl, n=3-5 per control group) cells using RT-qPCR. Relative expression of **(e)** *Cox1* and **(f)** *Cox2* in murine colonic tissue of HFD-fed mice compared to CD-fed littermates (6 weeks: HFD n=6, CD n=6; 12 weeks: HFD n=5, CD n=3-4). **(g) Top:** Dot blot analysis using anti-MUC2 on colonic tissue from HFD- and CD-fed mice after 6 weeks (HFD n=5, CD n=4) and **bottom:** 12 weeks (each group n=9), with Swift Membrane Stain™ as loading control. **(h)** Percentage [%] of *Klf4*⁺colonic ECs across mouse colonic epithelial cells positive for *Lyz*, *Reg4*, *Bmi1*, and *Hes1*. Single-cell transcriptomics dataset of colonic healthy mouse tissue publicly available at Tabula “Muris Senis, Large Intestine - A single-cell transcriptomic atlas characterizing ageing tissues in the mouse (10x)”41. **(i) Left:** Transcriptional differentiation profile of PA-stimulated HCEC-1CT cells (n=3) relative to DMSO-treated controls (Ctrl, n=3); **Mid:** SA-stimulated HCEC-1CT cells (n=4) relative to EtOH-treated controls (Ctrl, n=4); **Right:** OA-stimulated HCEC-1CT cells (n=4) relative to H2O-treated controls (Ctrl, n=4). **(j)** *CASP1* expression in human colonic organoids following stimulation with 10 *µ*M AA (n=5), normalized to paired DMSO-treated control organoids (Ctrl, n=5). **(k)** INSRß detection (WD n=5, CD n=5) and **(l)** phosphorylation status of AKT and AMPKα (WD n=11, CD n=6) in murine colonic tissue after 24-week dietary-intervention, determined by Western blotting. **(m)** Relative *MSH2* expression of FA-treated HCEC-1CT in comparison to the respective control treatment (each group n=4). **(a)**, **(c)**, **(e)**-**(f)**, **(i)**, **(m)** Two-way ANOVA with Fisher’s least significant difference (LSD) test. **(b)**, **(j)** Wilcoxon test. **(i)** Multiple Mann-Whitney test with unadjusted *P*-values. **(a)** Data shown as log-transformed individual data point. **(b)-(c)**, **(e)**, **(j)**-**(m)** Box plots depict the median and IQR with whiskers indicating the range. **(d)** Data depicted as median of log-transformed 2-∆Ct. **(h)** parts of a whole [%]. **(b)**-**(c), (i)**, **(j)**, **(m)** Relative values were calculated by normalizing to the paired control condition (set to 1) and **(e)**, **(f)** relative values were determined by normalization to the median of the respective CD control group (set to 1). **P*≤0.05, ***P*≤0.01, *****P*≤0.0001. AA, arachidonic acid; EC, epithelial cell; FA, fatty acid; IQR, interquartile range; OA, oleic acid; PA, palmitic acid; PDO, patient-derived organoid; SA, steric acid; WD, western-style diet.

**Supplementary Figure 2**

**
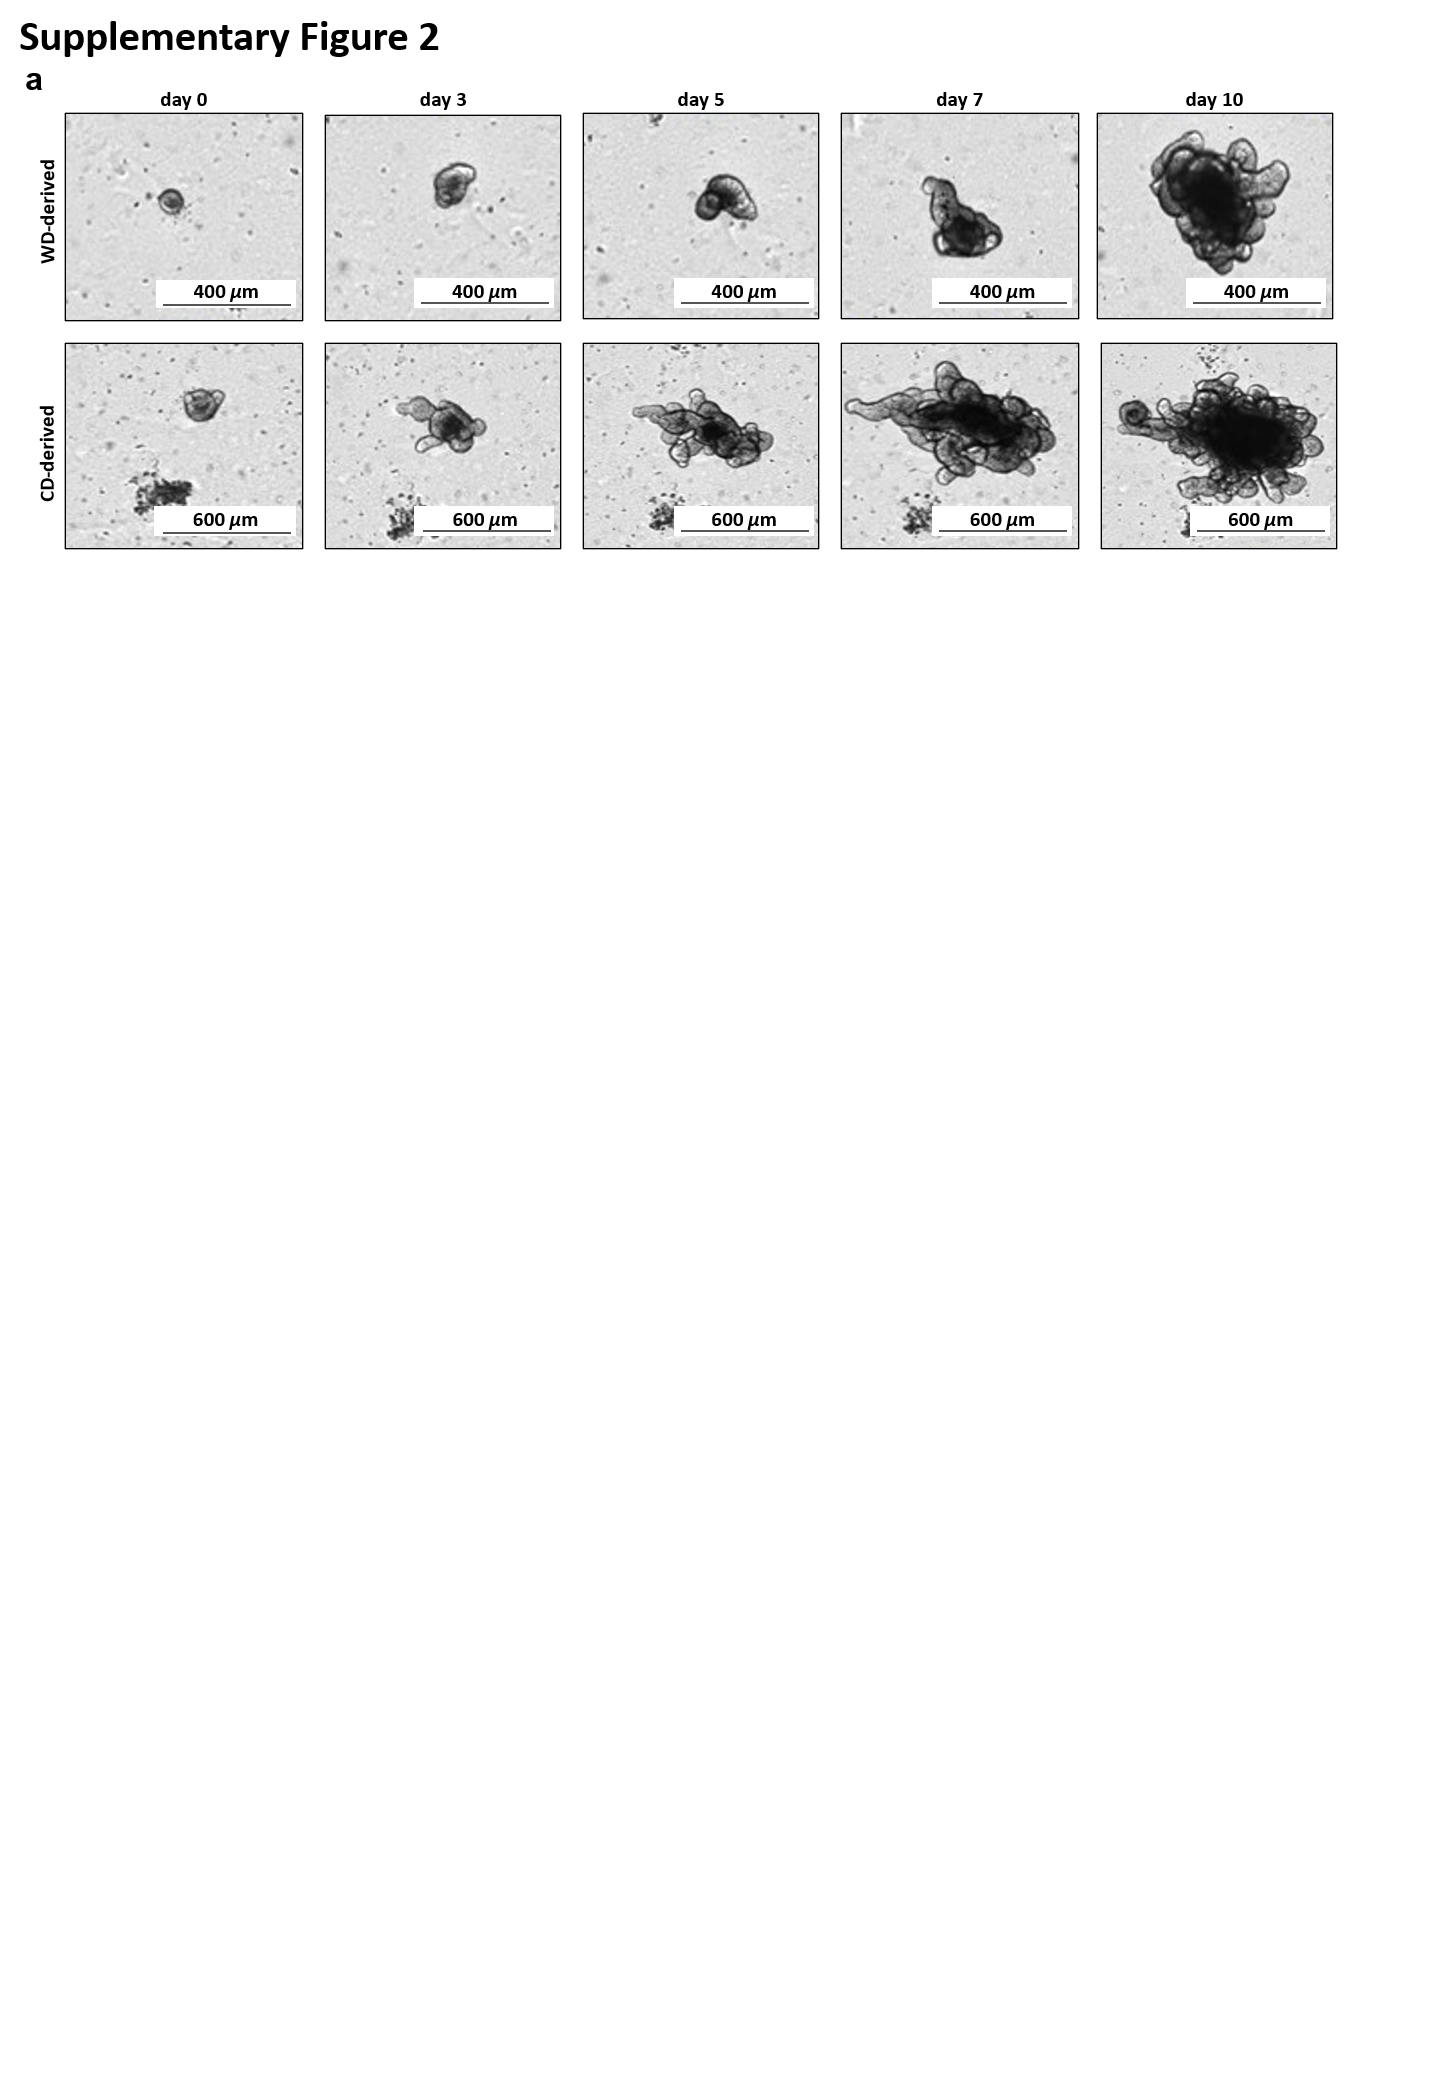
**

**Supplementary Fig. 2 | Basal growth of colonic organoid derived from WD- and CD-fed mice.
(a)** Representative brightfield microscopy image tracing of murine colonic organoid from WD- and CD-fed mice at day 0, day 3, day 5, day 7 and day 10 of basal cultivation.

**Supplementary Tables**

**Supplementary Table 1.** Diet composition as provided by the manufacturers.

| **Macronutrient** | **Autoclavable Rodent Diet 5010** | **D12450B** | **D12492i** | **D12331** | **Control (to Surwit)** |
| --- | --- | --- | --- | --- | --- |
| **Model** | CD, 6 weeks | CD, 12 weeks | HFD, 6 and 12 weeks | Surwit, 24 weeks | CD to Surwit, 24 weeks |
| Physiological fuel value | 3.430 kcal/g | 3.430 kcal/g | 5.240 kcal/g | 5.400 kcal/g | 3.695 kcal/g |
| Protein | 30 kcal% | 20 kcal% | 20 kcal% | 15 kcal% | 22 kcal% |
| Fat | 10 kcal% | 10 kcal% | 60 kcal% | 59 kcal% | 13 kcal% |
| Carbohydrates | 60 kcal% | 70 kcal% | 20 kcal% | 25 kcal% | 65 kcal% |

**Supplementary Table 2.** Results of statistical analysis serum 1H-NMR profiles (Multiple Mann-Whitney test, HFD *vs*. CD).

| **Metabolite** | **Below  threshold?** | ***P-*value** | **Mean rank HFD** | **Mean rank CD** | **Mean rank  diff.** | **Mann-Whitney U** |
| --- | --- | --- | --- | --- | --- | --- |
| Ethanol | Yes | 0.0065 | 3.75 | 9.25 | -5.50 | 1.50 |
| Trimethylamine-N-oxide | No | 0.2489 | 5.25 | 7.75 | -2.50 | 10.50 |
| Alanine | No | 0.6667 | 7.00 | 6.00 | 1.00 | 15.00 |
| Creatine | No | 0.1472 | 4.92 | 8.08 | -3.17 | 8.50 |
| Creatinine | No | 0.3593 | 7.58 | 5.42 | 2.17 | 11.50 |
| Glutamic acid | No | 0.7381 | 6.08 | 6.92 | -0.83 | 15.50 |
| Glutamine | No | 0.4589 | 5.67 | 7.33 | -1.67 | 13.00 |
| Glycine | No | 0.9740 | 6.42 | 6.58 | -0.17 | 17.50 |
| Histidine | No | 0.9784 | 6.58 | 6.42 | 0.17 | 17.50 |
| Isoleucine | No | 0.8571 | 6.25 | 6.75 | -0.50 | 16.50 |
| Leucine | No | 0.7251 | 6.08 | 6.92 | -0.83 | 15.50 |
| Lysine | No | 0.9134 | 6.67 | 6.33 | 0.33 | 17.00 |
| Methionine | No | 1.0000 | 6.50 | 6.50 | 0.00 | 18.00 |
| Ornithine | No | 0.1385 | 8.08 | 4.92 | 3.17 | 8.50 |
| Phenylalanine | No | 0.2035 | 5.08 | 7.92 | -2.83 | 9.50 |
| Proline | No | 0.6970 | 6.83 | 6.17 | 0.67 | 16.00 |
| Tyrosine | No | 0.3398 | 7.58 | 5.42 | 2.17 | 11.50 |
| Valine | No | 0.9697 | 6.42 | 6.58 | -0.17 | 17.50 |
| 2-Hydroxybutyric acid | No | 0.4545 | 7.50 | 5.50 | 2.00 | 12.00 |
| Acetic acid | Yes | 0.0022 | 3.50 | 9.50 | -6.00 | 0.00 |
| Citric acid | No | 0.3312 | 7.58 | 5.42 | 2.17 | 11.50 |
| Formic acid | No | 0.6926 | 7.17 | 5.83 | 1.33 | 14.00 |
| Lactic acid | Yes | 0.0087 | 3.83 | 9.17 | -5.33 | 2.00 |
| Succinic acid | No | 0.7879 | 6.83 | 6.17 | 0.67 | 16.00 |
| Choline | No | 0.0909 | 8.33 | 4.67 | 3.67 | 7.00 |
| 2-Oxoglutaric acid | No | 1.0000 | 6.58 | 6.42 | 0.17 | 17.50 |
| 3-Hydroxybutyric acid | No | 0.9177 | 6.33 | 6.67 | -0.33 | 17.00 |
| Acetone | No | 1.0000 | 6.33 | 6.67 | -0.33 | 17.00 |
| Pyruvic acid | No | 0.5173 | 5.75 | 7.25 | -1.50 | 13.50 |
| Glucose | Yes | 0.0065 | 9.33 | 3.67 | 5.67 | 1.00 |
| Glycerol | No | 0.9372 | 6.33 | 6.67 | -0.33 | 17.00 |
| TAG | No | 0.8182 | 6.83 | 6.17 | 0.67 | 16.00 |
| Cholesterol | Yes | 0.0022 | 9.50 | 3.50 | 6.00 | 0.00 |

**Supplementary Table 3.** Results of statistical analysis of faecal lipidome (Multiple Mann-Whitney test; CD *vs.* HFD).

| **Lipid** | **Below  threshold?** | ***P-*value** | **Mean rank CD** | **Mean rank HFD** | **Mean rank  diff.** | **Mann-Whitney U** |
| --- | --- | --- | --- | --- | --- | --- |
| AcCa (16:0) | Yes | 0.0159 | 3.00 | 7.50 | -4.50 | 0.00 |
| AcCa (18:0) | Yes | 0.0159 | 3.00 | 7.50 | -4.50 | 0.00 |
| AcCa (18:1) | No | 0.1905 | 3.80 | 6.50 | -2.70 | 4.00 |
| AcCa (24:0) | Yes | 0.0159 | 3.00 | 7.50 | -4.50 | 0.00 |
| CE (18:1) | Yes | 0.0159 | 7.00 | 2.50 | 4.50 | 0.00 |
| CE (20:4) | Yes | 0.0317 | 3.20 | 7.25 | -4.05 | 1.00 |
| CE (22:6) | Yes | 0.0317 | 6.80 | 2.75 | 4.05 | 1.00 |
| Cer (d32:0) | Yes | 0.0159 | 3.00 | 7.50 | -4.50 | 0.00 |
| Cer (d34:0) | Yes | 0.0159 | 3.00 | 7.50 | -4.50 | 0.00 |
| Cer (d34:1) | Yes | 0.0159 | 7.00 | 2.50 | 4.50 | 0.00 |
| Cer (d36:0) | Yes | 0.0317 | 3.20 | 7.25 | -4.05 | 1.00 |
| Cer (d36:1) | Yes | 0.0079 | 3.00 | 7.50 | -4.50 | 0.00 |
| Cer (d38:0) | No | 0.2857 | 4.00 | 6.25 | -2.25 | 5.00 |
| Cer (d40:0) | Yes | 0.0159 | 3.00 | 7.50 | -4.50 | 0.00 |
| Cer (d41:0) | No | 0.1905 | 3.80 | 6.50 | -2.70 | 4.00 |
| Cer (d44:0) | No | 0.4127 | 4.20 | 6.00 | -1.80 | 6.00 |
| CerG (d36:2) | Yes | 0.0159 | 3.00 | 7.50 | -4.50 | 0.00 |
| CerG (d40:0) | Yes | 0.0159 | 3.00 | 7.50 | -4.50 | 0.00 |
| CerG (d40:2) | Yes | 0.0159 | 3.00 | 7.50 | -4.50 | 0.00 |
| CerG (d41:2) | Yes | 0.0159 | 3.00 | 7.50 | -4.50 | 0.00 |
| CerG (d42:2) | Yes | 0.0317 | 3.20 | 7.25 | -4.05 | 1.00 |
| SA (C17:0) | No | 0.1111 | 6.40 | 3.25 | 3.15 | 3.00 |
| SA (C18:0) | No | 0.9048 | 5.20 | 4.75 | 0.45 | 9.00 |
| SA (C19:0) | Yes | 0.0159 | 7.00 | 2.50 | 4.50 | 0.00 |
| DAG (34:1) | No | 0.9048 | 4.80 | 5.25 | -0.45 | 9.00 |
| DAG (36:3) | Yes | 0.0159 | 7.00 | 2.50 | 4.50 | 0.00 |
| DAG (36:4) | Yes | 0.0159 | 7.00 | 2.50 | 4.50 | 0.00 |
| DAG (40:7) | Yes | 0.0159 | 7.00 | 2.50 | 4.50 | 0.00 |
| FA (16:0) | Yes | 0.0159 | 3.00 | 7.50 | -4.50 | 0.00 |
| FA (18:0) | Yes | 0.0159 | 3.00 | 7.50 | -4.50 | 0.00 |
| FA (18:1) | Yes | 0.0159 | 3.00 | 7.50 | -4.50 | 0.00 |
| FA (18:2) | No | 0.0635 | 3.40 | 7.00 | -3.60 | 2.00 |
| FA (20:0) | Yes | 0.0159 | 3.00 | 7.50 | -4.50 | 0.00 |
| FA (20:1) | Yes | 0.0159 | 3.00 | 7.50 | -4.50 | 0.00 |
| FA (20:4) | Yes | 0.0159 | 3.00 | 7.50 | -4.50 | 0.00 |
| FA (22:4) | No | 0.2857 | 4.20 | 6.00 | -1.80 | 6.00 |
| FA (22:5) | No | 0.1905 | 3.80 | 6.50 | -2.70 | 4.00 |
| FA (22:6) | No | 0.9048 | 5.20 | 4.75 | 0.45 | 9.00 |
| FA (24:0) | No | 0.9048 | 4.80 | 5.25 | -0.45 | 9.00 |
| FA (24:1) | Yes | 0.0079 | 3.00 | 7.50 | -4.50 | 0.00 |
| LPC (16:0) | Yes | 0.0159 | 3.00 | 7.50 | -4.50 | 0.00 |
| LPC (17:0) | Yes | 0.0159 | 3.00 | 7.50 | -4.50 | 0.00 |
| LPC (18:0) | Yes | 0.0159 | 3.00 | 7.50 | -4.50 | 0.00 |
| LPC (18:1) | No | 0.0635 | 3.40 | 7.00 | -3.60 | 2.00 |
| LPC (18:2) | No | 0.9048 | 5.20 | 4.75 | 0.45 | 9.00 |
| LPC (20:0) | Yes | 0.0159 | 3.00 | 7.50 | -4.50 | 0.00 |
| LPC (20:4) | Yes | 0.0159 | 3.00 | 7.50 | -4.50 | 0.00 |
| LPC (22:0) | Yes | 0.0159 | 7.00 | 2.50 | 4.50 | 0.00 |
| LPC (22:1) | Yes | 0.0159 | 3.00 | 7.50 | -4.50 | 0.00 |
| LPC (24:0) | Yes | 0.0159 | 7.00 | 2.50 | 4.50 | 0.00 |
| LPC (24:1) | No | 0.9048 | 5.20 | 4.75 | 0.45 | 9.00 |
| LPI (18:0) | Yes | 0.0159 | 3.00 | 7.50 | -4.50 | 0.00 |
| DeoxySA (C18:0) | Yes | 0.0317 | 6.80 | 2.75 | 4.05 | 1.00 |
| Deoxysphingosine (C18:1) | No | 1.0000 | 5.00 | 5.00 | 0.00 | 10.00 |
| Oleoyl-EA (C18:1) | Yes | 0.0159 | 7.00 | 2.50 | 4.50 | 0.00 |
| PC (30:0) | Yes | 0.0159 | 3.00 | 7.50 | -4.50 | 0.00 |
| PC (31:0) | Yes | 0.0317 | 3.20 | 7.25 | -4.05 | 1.00 |
| PC (32:1) | Yes | 0.0159 | 3.00 | 7.50 | -4.50 | 0.00 |
| PC (33:0) | No | 0.2063 | 3.90 | 6.38 | -2.48 | 4.50 |
| PC (34:1) | Yes | 0.0159 | 3.00 | 7.50 | -4.50 | 0.00 |
| PC (34:2) | Yes | 0.0159 | 3.00 | 7.50 | -4.50 | 0.00 |
| PC (36:1) | Yes | 0.0159 | 3.00 | 7.50 | -4.50 | 0.00 |
| PC (36:2) | Yes | 0.0159 | 3.00 | 7.50 | -4.50 | 0.00 |
| PC (36:4) | Yes | 0.0159 | 3.00 | 7.50 | -4.50 | 0.00 |
| PC (38:4) | Yes | 0.0159 | 3.00 | 7.50 | -4.50 | 0.00 |
| PC (38:5) | Yes | 0.0159 | 3.00 | 7.50 | -4.50 | 0.00 |
| PC (38:6) | Yes | 0.0159 | 3.00 | 7.50 | -4.50 | 0.00 |
| PC (40:6) | Yes | 0.0159 | 3.00 | 7.50 | -4.50 | 0.00 |
| PC (40:8) | Yes | 0.0159 | 3.00 | 7.50 | -4.50 | 0.00 |
| PE (31:0) | No | 0.1905 | 6.20 | 3.50 | 2.70 | 4.00 |
| PE (32:0) | No | 0.9048 | 4.80 | 5.25 | -0.45 | 9.00 |
| PE (32:1) | No | 0.5556 | 4.40 | 5.75 | -1.35 | 7.00 |
| PE (34:1) | Yes | 0.0159 | 3.00 | 7.50 | -4.50 | 0.00 |
| PE (36:2) | No | 0.5556 | 5.60 | 4.25 | 1.35 | 7.00 |
| Palmitoyl-EA (C16:0) | Yes | 0.0159 | 7.00 | 2.50 | 4.50 | 0.00 |
| SM (d32:0) | Yes | 0.0159 | 3.00 | 7.50 | -4.50 | 0.00 |
| SM (d32:1) | Yes | 0.0159 | 3.00 | 7.50 | -4.50 | 0.00 |
| SM (d34:0) | Yes | 0.0159 | 3.00 | 7.50 | -4.50 | 0.00 |
| SM (d34:1) | Yes | 0.0159 | 3.00 | 7.50 | -4.50 | 0.00 |
| SM (d34:2) | Yes | 0.0159 | 3.00 | 7.50 | -4.50 | 0.00 |
| SM (d36:0) | Yes | 0.0159 | 3.00 | 7.50 | -4.50 | 0.00 |
| SM (d36:1) | Yes | 0.0159 | 3.00 | 7.50 | -4.50 | 0.00 |
| SM (d38:0) | Yes | 0.0159 | 3.00 | 7.50 | -4.50 | 0.00 |
| SM (d38:1) | Yes | 0.0159 | 3.00 | 7.50 | -4.50 | 0.00 |
| SM (d39:1) | Yes | 0.0159 | 3.00 | 7.50 | -4.50 | 0.00 |
| SM (d40:0) | Yes | 0.0159 | 3.00 | 7.50 | -4.50 | 0.00 |
| SM (d40:1) | Yes | 0.0159 | 3.00 | 7.50 | -4.50 | 0.00 |
| SM (d40:2) | No | 0.2857 | 4.00 | 6.25 | -2.25 | 5.00 |
| SM (d41:0) | Yes | 0.0159 | 3.00 | 7.50 | -4.50 | 0.00 |
| SM (d41:1) | Yes | 0.0159 | 3.00 | 7.50 | -4.50 | 0.00 |
| SM (d42:0) | Yes | 0.0159 | 3.00 | 7.50 | -4.50 | 0.00 |
| SM (d42:1) | Yes | 0.0159 | 3.00 | 7.50 | -4.50 | 0.00 |
| SM (d42:2) | No | 0.5556 | 4.40 | 5.75 | -1.35 | 7.00 |
| SM (d42:3) | No | 0.1905 | 3.80 | 6.50 | -2.70 | 4.00 |
| SM (d43:3) | No | 0.0556 | 6.60 | 3.00 | 3.60 | 2.00 |
| Phytosphingosine (C18:0) | No | 0.9048 | 5.20 | 4.75 | 0.45 | 9.00 |
| TAG (48:1) | No | 0.4127 | 4.20 | 6.00 | -1.80 | 6.00 |
| TAG (51:1) | Yes | 0.0159 | 3.00 | 7.50 | -4.50 | 0.00 |
| TAG (52:1) | Yes | 0.0159 | 3.00 | 7.50 | -4.50 | 0.00 |
| TAG (54:1) | Yes | 0.0159 | 3.00 | 7.50 | -4.50 | 0.00 |
| TAG (54:6) | Yes | 0.0317 | 6.80 | 2.75 | 4.05 | 1.00 |
| TAG (54:7) | Yes | 0.0159 | 7.00 | 2.50 | 4.50 | 0.00 |
| TAG (56:0) | Yes | 0.0159 | 3.00 | 7.50 | -4.50 | 0.00 |
| TAG (56:3) | No | 0.2857 | 6.00 | 3.75 | 2.25 | 5.00 |

|  | **Tissue** | **Male (n)** | **Female**  **(n)** | **Sex  un-known (n)** | **Median age**  **(y)** | **TNM** | **Tumour**  **stage** | **Tumour grade (n)** | **Tumour cells** |
| --- | --- | --- | --- | --- | --- | --- | --- | --- | --- |
| Paired samples from CRC patients for **Figure 6g** (OriGene) | normal | 5 | 5 | 0 | 74.5 | N.A. | N.A. | N.A. | N.A. |
| tumour | 5 | 5 | 0 | pT3pN0pMX | IIA (10) | G1 (3) G2 (7) | 60-89 |
| Tissue Scan Colon Cancer tissue qPCR Panel *III* Matched pairs for **Figure 6h** (OriGene, #HCRT10303) | normal | 11 | 13 | 0 | 76 | N.A. | N.A. | N.A. | N.A. |
| tumour | 11 | 13 | 0 | pT2pN0pMX  pT1pN0pMX  pT3pN0pMX  pT4pN0pMX  pTXpN1pMX  pT1pN1pMX  pT3pN1pMX  pT4pN2pMX  pT3pNXpM1 | I (5), II (7), III (8), IV (4) | N.A. (2)  G10 (10), G2 (13), G3 (1) | 40-95 |
| Human colonic biopsies of hospitalized normal patients for qPCR  (Az-19-233; Az-2023-172; Az-05-112) | normal | 7 | 3 | 1 | 67.5 | N.A. | N.A. | N.A. | N.A. |
| Healthy colonic biopsy donors for organoid generation (Az-21-415) | normal | 2 | 3 | 0 | 34 | N.A. | N.A. | N.A. | N.A. |
| nonCRC serum donors (Az-21-415) | N.A. | 22 | 39 | 0 | 45 | N.A. | N.A. | N.A. | N.A. |
| CRC serum donors  (Az-16-282) | N.A. | 40 | 24 | 0 | 70 | N.A. | I (11),  II (18),  III (14),  IV (2),  N.A. (38) | N.A. | N.A. |

**Supplementary Table 4.** Patient characteristics of tissue and serum samples.

**Supplementary Table 5.** Sequences of the primer pairs used for RT-qPCR (produced by Metabion international AG, Planegg, Germany).

| **Target genes human:** | **Forward primer (5‘-3‘)** | **Reverse primer (5‘-3‘)** |
| --- | --- | --- |
| *ACTB* | *ACATCCGCAAAGACCTGTACG* | *TTGCTGATCCACATCTGCTGG* |
| *ALCAM* | *CTTCTGCCTCTTGATCTCCG* | *AAATACTGGGGAGCCATCG* |
| *ALOX15* | *TGGATGTCAAGGCCAAC* | *CATGTCAGAGACCAGCCCAG* |
| *ALOX5* | *TGCCAACAAAACAGACCCCT* | *GAAGGTGGGTGATGGTCTGG* |
| *ALPI* | *CCCGCTTTAACCAGTGCAAC* | *GGAAACATGTACTTGCGGCC* |
| *ATOH1* | *CCAGCTGCGCAATGTTATCC* | *TGCTGTTTTCCTCCTGCACT* |
| *BIRC5* | *GGACCACCGCATCTCTACAT* | *GTCGTCATCTGGCTCCCA* |
| *BMI1* | *ATGTGTGTGCTTTGTGGAGG* | *TCCGATCCAATCTGTTCTGG* |
| *CASP1* | *CAAGACCTCTGACAGCACGT* | *GCATCTGCGCTCTACCATCT* |
| *CD36* | *AAAACGGCTGCAGGTCAAC* | *TCACCACACCAACACTGAGT* |
| *CD44* | *TGCCGCTTTGCAGGTGTATT* | *CCGATGCTCAGA GCTTTCTCC* |
| *COX1* | *AGCCCTTCAATGAGTACCGC* | *ACTCCGGAGAACAGATGGGA* |
| *COX2* | *ATGATTGCCCGACTCCCTTG* | *AACTGATGCGTGAAGTGCTG* |
| *DGAT1* | *GAGCTACCCGGACAATCTGA* | *GCGTGAGTAGTCCATGTCCT* |
| *DLL1* | *ACTGAGAAGCTAGAGGGCCA* | *AGTCCGCCTTCTTGTTGGT* |
| *EGF* | *ACTTGTTTCCTGTCCACGCA* | *TGGTTGTGGTCCTGAAGCTG* |
| *HES1* | *GAAGAAAGATAGCTCGCGGCA* | *GGAAAGCAAACTGGCCATCG* |
| *HMGCS1* | *GCACAGTACTCACCTCAGCA* | *CGAAGACATCTGGTGCCACA* |
| *HOPX* | *CTTCAACAAGGTCGACAAGC* | *GTGACGGATCTGCACTCTGA* |
| *INSR* | *CGCTCTGGTGTCACTTTCCT* | *ATGTCGTTTCTCTCCTGGCG* |
| *KLF4* | *CCATCTTTCTCCACGTTCG* | *ATCGGATAGGTGAAGCTGCA* |
| *LDHA* | *GCACCCAGTTTCCACCATGA* | *GCACTCTTCTTCAAACGGGC* |
| *LGR5* | *CACACACTG TCATTGCGAG* | *GCTTCTGTGGGTACGTGTCTT* |
| *LRP5* | *CTGCATGGACTGAGGAACG* | *CGGCTGTAGATGTCGATGC* |
| *LRP6* | *ATCTCGACAGTCAGGGTGGA* | *CGGGGCTCTGTTGTTCATC* |
| *LYZ* | *GCCTAGCAAACTGGATGTGT* | *ATGCCTTGTGGATCACGGAC* |
| *MLH1* | *CCTACTTCCAGCAACCCCAG* | *TGAGGATTCACACAGCCCAC* |
| *MSH2* | *AGTGCAGCCAGAGATCTTGG* | *GGCATCCTGGGCTTCAT* |
| *MSI1* | *AGCCAAAGGAGGTGATGTCG* | *GCAGTGAGAGGAATGGCTGT* |
| *MUC2* | *GACGGAGCTGAAGTTGGAAG* | *GGACACGGAGATGTTGGAGT* |
| *PMS2* | *ATCTCGCAACCCCAAACACA* | *GAGTCTGAGGTGCTATGAGCC* |
| *RARRES2* | *GTGCAAAGTCAGGCCCAATG* | *GCGAACTGTCCAGGGAAGTA* |
| *REG4* | *TCCTATTGCTGAGCTGCCTG* | *CGGCATCAGACCAGTTCCTC* |
| *SLC2A1* | *TGGCATCAACGCTGTCTTCT* | *CTAGCGCGATGGTCATGAGT* |
| *SLC2A3* | *GGCTGCTTTATGGGACTGTG* | *CAAAATGGAAGGGCTGCACT* |
| *SLC2A4* | *TAGGCTCCGAAGATGGGGAA* | *GGAAAAGATGGCCACGGAGA* |
| *SLC5A1* | *TGCTGGTGGGGTCTTTAATC* | *GGATGGACATCCCAAAGATG* |
| *SPDEF* | *GATTCACTACTGTGCCTCGAC* | *ATGTCTGGCTTCCGGATGAT* |
| *UBC* | *CCGGGATTTGGGTCGCAG* | *TCACGAAGATCTGCATTGTCAAG* |
| **Target genes mouse:** | **Forward primer (5‘-3‘)** | **Reverse primer (5‘-3‘)** |
| *Rn18S* | *GCAAATTACCCACTCCCGAC* | *CCGCTCCCAAGATCCAACTA* |
| *Alpi* | *GGACATCGCCACTCAACTCA* | *TGGTCAATACGACCCCCTTC* |
| *Alox12* | *GCCTGCTGA GAATCCCAA GT* | *GGTGAGGAA ATGGCAGAGCT* |
| *Alox15* | *ATGGTGCTGAAGCGGTCTAC* | *ATCCGCTTCAAACAGAGTGC* |
| *Alox5* | *GCGCAAATACTGGCTCCAT* | *TACGTCTGTGCTGCTTGAGG* |
| *Atoh1* | *GTGGGGTTGTAGTGGACGAG* | *GTTGCTCTCCGACATTGGG* |
| *Bmi1* | *GCTCCAATGAAGACCGAGGA* | *CAGCTCTCCAGCATTCGTCA* |
| *Casp1* | *CTTCAATCAGCTCCATCAGC* | *CACGGCATGCCTGAATAATG* |
| *Cd44* | *CGGCGCTAAAGATGCAAGAA* | *TTCTGCCCACACCTTCTCCT* |
| *Cox1* | *AGTCGAAGGAGTCTCTCGCT* | *CCAGGTCCAGATCTCAGGGA* |
| *Cox2* | *ATGACTGCCCAACTCCCATG* | *ACTGATGGGTGAAGTGCTGG* |
| *Daglβ* | *GGTGGCCGCTCTACATCTAC* | *GGGCAGCTCATACACCTTGT* |
| *Dgat1* | *TCTCTTAAAGCTGGCGGTCC* | *CCACTTGTGCACGGGGATA* |
| *Hes1* | *CAAACCAAAGACGGCCTCT* | *GTCACCTCGTTCATGCACTC* |
| *Hopx* | *TCAACAAGGTCAACAAGCACC* | *CCGTAACAGATCTGCATTCCG* |
| *Insr* | *CAGCAACTTGATGTGCACCC* | *CATAGGAGCGGCGGATCTTT* |
| *Klf4* | *GGGAAGGGAGAAGACACTGC* | *GGTGGGTTAGCGAGTTGGA* |
| *Ldha* | *TTGCCCTTGTTGACGTCATG* | *GCCACTGATTTTCCAAGCCA* |
| *Lgr5* | *CGGCAACAGTGTGGACGACCT* | *GCGAGCACTGCACCGAGTGA* |
| *Lpl* | *TTCAGAGTTTGACCGCCTTC* | *AAGGTCTTGCTGCTGTGGTT* |
| *Lyz* | *GCCAAGGTCTACAATCGTTGTGAGTTG* | *CAGTCAGCCAGCTTGACACCACG* |
| *Mki67* | *CCTGCCCGACCCTACAAAAT* | *TTGCTCACACTCGATGCAGT* |
| *Mlh1* | *TTCACCCAGACCTTGCTTCC* | *AGCTGTCATTTCCTTCCCGG* |
| *Msh2* | *ATGGGGAAACTGAGGCAGG* | *TTGAGGGCTCTAACTGCTGC* |
| *Msi1* | *GAGCAGTTCGGAAAGGTGGA* | *ACATCACCTCCTTTGGCTGG* |
| *Pdh* | *GCTGCTGAAGAGGCGTTTT* | *TCAGAGATGGGCTTTGCTG* |
| *Pkm* | *TGAAGAAGGGAGCCACTCTG* | *CCAACATCCATGGCCAAG* |
| *Pms2* | *TGTGTTTGGCCAGAAGCAGT* | *AGTGGCTGCTGGTTGACATT* |
| *Reg4* | *CCCGAAGTCCTGAGCGATAT* | *CCACACAGGCAGGTTTCTCT* |
| *Rarres2* | *GCCTTCCAAGAGATCGGTGT* | *ATTTCCGCCTTCTCCCGTTT* |
| *Rn18S* | *GCAAATTACCCACTCCCGAC* | *CCGCTCCCAAGATCCAACTA* |
| *Spdef* | *GGAGAAGGCAGCATCAGGA* | *CCAGGGTCTGCTGTGATGT* |
| *Tert* | *ACTCCGTTGTCATCGAGCAG* | *GTAAAAGCAACCCATCCCGC* |

**Supplementary Table 6.** Applied primary and secondary antibodies.

| **Primary antibodies** | **Species** | **Company** | **Working concentration** |
| --- | --- | --- | --- |
| Anti-α-TUBULIN (#2125) | rabbit | Cell Signaling Technology, Danvers, Massachusetts, USA | 1:1000 (WB)a |
| Anti-PROCASPASE-1 +p10 +p12 (#ab179515) | rabbit | Abcam, Cambridge, United Kingdom | 1:1000 (WB)a |
| Anti-KI67 (D3B5) (#12202) | rabbit | Cell Signaling Technology, Danvers, Massachusetts, USA | 1:400 (IHC)a |
| Anti-MSH2 (#2017) | rabbit | Cell Signaling Technology, Danvers, Massachusetts, USA | 1 µg/ml (WB) |
| Anti-PHOSPHO-AKT (Ser473) (D9E) XP (#4025) | rabbit | Cell Signaling Technology, Danvers, Massachusetts, USA | 1:1000 (WB)a |
| Anti-AKT (#9272) | rabbit | Cell Signaling Technology, Danvers, Massachusetts, USA | 1:1000 (WB)a |
| Anti-p44/42 MAPK (Erk1/2) (137F5) (#4695) | rabbit | Cell Signaling Technology, Danvers, Massachusetts, USA | 1:1000 (WB)a |
| Anti-PHOSPHO-p44/42 MAPK (Erk1/2) (Thr202/Tyr204) (D13.14.4E) XP (#4370) | rabbit | Cell Signaling Technology, Danvers, Massachusetts, USA | 1:1000 (WB)a |
| Anti-AMPKα (#2532) | rabbit | Cell Signaling Technology, Danvers, Massachusetts, USA | 1:1000 (WB)a |
| Anti-PHOSPHO-AMPKα (Thr172) (40H9) (#2535) | rabbit | Cell Signaling Technology, Danvers, Massachusetts, USA | 1:1000 (WB)a |
| Anti-MUC2 (#GTX63560) | rabbit | GeneTex, California, USA | 1:1000 (WB)a |
| Anti-INSR ß (E9L5V)(#23413) | rabbit | Cell Signaling Technology, Danvers, Massachusetts, USA | 1:1000 (WB)a |
| **Secondary antibodies/**  **labelled polymers** |  | **Company** | **Working concentration** |
| Anti-rabbit IgG HRP |  | Cell Signaling Technology, Danvers, Massachusetts, USA | 1:4000 (WB)a |
| EnVision anti-rabbit HRP system |  | Agilent, Santa Clara, California, USA | N.A. |
| EnVision anti-mouse HRP system |  | Agilent, Santa Clara, California, USA | N.A. |

**a** If stock concentration was not provided by the manufacturer, dilution from stock solution was listed.
